# 1 **MEDIAL FRONTAL THETA IS ENTRAINED TO THE LICK CYCLE**

2 Linda M. Amarante<sup>1</sup>, Marcelo A. Caetano<sup>2</sup>, and Mark Laubach<sup>1\*</sup>

3 <sup>1</sup>Department of Biology and Center for Behavioral Neuroscience, American  
4 University, Washington, DC, USA; <sup>2</sup>Center for Mathematics, Computation and  
5 Cognition, Universidade Federal do ABC, Santo André, Brazil

## 6 **\*Corresponding author:**

7 Mark Laubach, PhD  
8 Department of Biology  
9 Center for Behavioral Neuroscience  
10 American University  
11 4400 Massachusetts Avenue NW  
12 Washington, DC 20016-8062  
13 mark.laubach@american.edu

14 **Abbreviated title:** Medial frontal theta and reward consumption

15 **Number of pages:** 47

16 **Number of figures:** 10

17 **Number of words:** **Abstract:** 250; **Introduction:** 588; **Discussion:** 1,449

18 **Conflict of Interest:** None

19 **Financial Support:** NSF grant 1121147, NIH grant DK099792-01A1, and two  
20 grants from the Klarman Family Foundation to ML and a NSF Graduate Research  
21 Fellowship to LMA.

22 **Acknowledgements:** We thank Alexxai Kravitz, Catherine Stoodley, and Kyra  
23 Swanson for helpful comments on the manuscript.

## 24 **Abstract**

25 Rodents lick to consume fluids. The reward value of ingested fluids is likely to be encoded  
26 by neuronal activity entrained to the lick cycle. Here, we investigated relationships  
27 between licking and reward signaling by the medial frontal cortex [MFC], a key cortical  
28 region for reward-guided learning and decision-making. Multi-electrode recordings of  
29 spike activity and field potentials were made in male rats as they performed an incentive  
30 contrast licking task. Rats received access to higher and lower value sucrose rewards  
31 over alternating 30 sec periods. They learned to lick persistently when higher value  
32 rewards were available and to suppress licking when lower value rewards were available.  
33 Spectral analysis of spikes and fields revealed evidence for reward value being encoded  
34 by the strength of phase-locking of a 6-12 Hz theta rhythm to the rats' lick cycle.  
35 Recordings during the initial acquisition of the task found that the strength of phase-  
36 locking to the lick cycle was strengthened with experience. A modification of the task,  
37 with a temporal gap of 2 sec added between reward deliveries, found that the rhythmic  
38 signals persisted during periods of dry licking, a finding that suggests the MFC encodes  
39 either the value of the currently available reward or the vigor with which rats act to  
40 consume it. Finally, we found that reversible inactivations of the MFC in the opposite  
41 hemisphere eliminated the encoding of reward information. Together, our findings  
42 establish that a 6-12 Hz theta rhythm, generated by the rodent medial frontal cortex, is  
43 synchronized to the lick cycle.

#### 44 **Significance Statement**

45 The cellular and behavioral mechanisms of reward signaling by the medial frontal cortex  
46 [MFC] have not been resolved. We report evidence for a 6-12 Hz theta rhythm that is  
47 generated by the MFC and synchronized with ongoing consummatory actions. Previous  
48 studies of MFC reward signaling have inferred value coding upon temporally sustained  
49 activity during the period of reward consumption. Our findings suggest that MFC activity  
50 is temporally sustained due to the consumption of the rewarding fluids, and not  
51 necessarily the abstract properties of the rewarding fluid. Two other major findings were  
52 that the MFC reward signals persist beyond the period of fluid delivery and are generated  
53 by neurons within the MFC.

## 54 **Introduction**

55        Reward-related neuronal activity is commonly found in the medial frontal cortex  
56 [MFC], aka mPFC, of humans (Glascher et al., 2009; Levy and Glimcher, 2011), primates  
57 (Watanabe, 1996; Shidara and Richmond, 2002; Roesch and Olson, 2004; Amiez et al.,  
58 2006; Padoa-Schiappa and Assad, 2006; Hayden et al., 2009; Luk and Wallis, 2009;  
59 Bouret and Richmond, 2010; Cai and Padoa-Schioppa, 2012), and rodents (Petyko et al.,  
60 2009; Horst and Laubach, 2012, 2013; Donnelly et al., 2014; Petyko et al., 2015).  
61 However, the behavioral determinants of these signals are not understood. In  
62 neurophysiological studies in experimental animals, rewards are typically given as liquids  
63 (Apicella et al., 1991; Carelli and Deadwyler, 1994) to avoid issues with chewing and  
64 grinding foods. A fixed cycle of specific behaviors (jaw opening, tongue protrusion and  
65 retraction, jaw closing, swallowing) underlies the processing of liquid rewards. These  
66 behaviors should have a major impact on reward signaling by the MFC.

67        Indeed, Horst and Laubach (2012) reported that MFC activity is sharply modulated  
68 when thirsty rats lick to consume water rewards in a MFC-dependent working memory  
69 task (Horst and Laubach, 2009). By modifying the task to delay the delivery of water on  
70 some trials, a subpopulation of MFC neurons was revealed that were selectively activated  
71 by the initiation of licking (Horst and Laubach, 2013). These changes in spike activity are  
72 accompanied by prominent fluctuations of MFC local field potentials [LFPs], specifically  
73 near the rats' licking frequency (5-7 Hz). These signals were most prevalent in the most  
74 rostral MFC. A subsequent study found that reversible inactivation of this rostral part of  
75 the MFC dramatically reduces the duration of licking bouts (Parent et al., 2015a), similar  
76 to how inactivation of the more caudal MFC leads to excessive premature responding in  
77 tasks that require actions to be sustained over delay periods (e.g., Narayanan et al.,

78 2006). These studies suggest that the rostral MFC is specialized for the value-guided  
79 control of consummatory behavior.

80 The goal of the present study was to determine if licking-related neuronal activity in  
81 the rostral MFC is sensitive to the reward value of ingested fluids. To examine this issue,  
82 we used a simple take-it-or-leave decision-making task, called the Shifting Values Licking  
83 Task (Parent et al., 2015a,b), to study reward signaling in relation to ongoing  
84 consummatory actions. Rats lick on a spout to receive liquid sucrose rewards and the  
85 concentration of sucrose alternates between a higher (better) and lower (worse) option  
86 every 30 sec. After only a few days of training, the rats learn to persistently lick when the  
87 better option is available and to suppress licking when the worse option is available.  
88 Bilateral reversible inactivations of the rostral MFC impair performance in this task  
89 (Parent et al., 2015a), resulting in temporally fragmented licking (dramatic reductions in  
90 the duration of licking bouts). Opposite effects are found after intra-MFC infusions of  
91 drugs that are known to enhance neuronal excitability near the licking frequency, such as  
92 the M-channel blocker XE-991 (Hu et al., 2002), and the “hunger hormone” ghrelin  
93 (Parent et al., 2015b).

94 To examine how the rostral MFC encodes reward information and controls value-  
95 guided consumption, we recorded spike activity and local field potentials [LFP] as rats  
96 performed the Shifting Values Licking Task. We found that neuronal activity in the MFC is  
97 entrained to the lick cycle when animals consume liquid sucrose rewards. These signals  
98 develop with experience, persist beyond periods of fluid delivery, and depend on MFC  
99 neurons. Together, our findings suggest that a 6-12 Hz rhythm generated by MFC neurons  
100 tracks engagement in reward-based consummatory behavior and encodes reward  
101 information.

## 102 **Materials and Methods**

103           Procedures were approved by the Animal Use and Care Committees at the John B.  
104 Pierce Laboratory (where some of the experiments were conducted) and American  
105 University and conformed to the standards of the National Institutes of Health Guide for  
106 the Care and Use of Laboratory Animals. All efforts were taken to minimize the number of  
107 animals used and to reduce pain and suffering.

## 108 ***Experimental Design***

### 109 *Animals*

110           Male Long Evans rats weighing between 300 and 325 g were purchased from Harlan  
111 or Charles River. Rats were given one week to acclimate with daily handling prior to  
112 behavioral training or surgery and were then kept with regulated access to food to  
113 maintain 90% of their free-feeding body weight. They were given ~18g of standard rat  
114 chow each day in the evenings following experiments. Rats were single-housed in their  
115 home cages in a 12h light/dark cycle colony room, with experiments occurring during the  
116 light cycle. A total of 11 rats had a microwire array implanted into medial frontal cortex.  
117 Some rats additionally had a drug cannula implanted into the opposite hemisphere using  
118 the same stereotaxic coordinates. Arrays were made by Tucker-Davis Technologies and  
119 consisted of 16 blunt-cut 50- $\mu\text{m}$  tungsten wires, insulated with Formvar, separated by  
120 250  $\mu\text{m}$  within each row and 500  $\mu\text{m}$  between rows. In vitro impedances for the  
121 microwires were ~150 k $\Omega$ .

### 122 *Surgeries*

123           Animals had full access to food and water in the days prior to surgery. Stereotaxic

124 surgery was performed using standard methods (e.g., Narayanan and Laubach, 2006).  
125 Briefly, animals were lightly anesthetized with isoflurane (2.5% for ~2 min), and were  
126 then injected intraperitoneally with ketamine (100mg/kg) and either xylazine (10 mg/kg)  
127 or dexdomitor (0.25mg/kg) to maintain a surgical plane of anesthesia. Craniotomies were  
128 made above the implant location. Microwire arrays were placed into the medial frontal  
129 cortex (coordinates from bregma: AP: +3.2 mm; ML:  $\pm$  1.0 mm; DV: -2.2 mm from the  
130 surface of the brain, at a 12° posterior angle). Four skull screws were placed along the  
131 edges of the skull and a ground wire was secured in the intracranial space above the  
132 posterior cerebral cortex. Electrode arrays were connected to a headstage cable and  
133 modified Plexon preamplifier during surgery and recordings were made to assess neural  
134 activity during array placement. Drug cannulas, 26-gauge PEEK (Plastics One), were  
135 implanted prior to the microwire arrays using similar procedures. Craniotomies were  
136 sealed using cyanoacrylate (Slo-Zap) and an accelerator (Zip Kicker), and methyl  
137 methacrylate dental cement (AM Systems) was applied and affixed to the skull via the  
138 skull screws. Animals were given a reversal agent for either xylazine (yohimbine, 2mg/ml)  
139 or dexdomitor (Antisedan, s.c. 0.25 mg/ml) and Carprofen (5 mg/kg, s.c.) was  
140 administered for postoperative analgesia. Animals recovered from surgery in their home  
141 cages for at least one week with full food and water, and were weighed and handled daily.

#### 142 Behavioral Apparatus

143 Rats were trained in operant chambers housed within a sound-attenuating external  
144 chamber (Med Associates, St. Albans, VT). Operant chambers contained a custom-made  
145 drinking spout that was connected to multiple fluid lines allowing for multiple fluids to be  
146 consumed at the same location. The spout was centered on one side of the operant

147 chamber wall at a height of 5 to 6.5cm from the chamber floor. Tygon tubing connected  
148 to the back of the drinking spout would administer the fluid from a 60cc syringe hooked  
149 up to a PHM-100 pump (Med Associates). A “light-pipe” lickometer (Med Associates)  
150 detected licks via an LED photobeam, and each lick triggered the pump to deliver roughly  
151 0.025 ml per 0.5 sec. Behavioral protocols were run though Med-PC version IV (Med  
152 Associates), and behavioral data was sent via TTL pulses from the Med-PC software to the  
153 Plexon recording system.

#### 154 Continuous-Access Shifting Values Licking Task

155 The operant licking task used here is similar to that previously described in Parent  
156 et al. (2015a,b). Briefly, rats were placed in the operant chamber for 30 min, where they  
157 were solely required to lick at the drinking spout to obtain a liquid sucrose reward. Licks  
158 activated the syringe pumps to deliver liquid sucrose over 0.5 sec. Every 30 sec, the  
159 reward alternated between a high concentration (20% weight per volume) and low  
160 concentration (2-4% wt/vol) of sucrose. The animal’s licking behavior was constantly  
161 monitored.

#### 162 Instrumental Shifting Values Licking Task

163 The operant licking task used above was modified slightly to allow for assessment  
164 of reinforced versus non-reinforced licks. A 2-sec inter-pump interval was included  
165 between each pump activation. In other words, the rat would lick to activate a liquid  
166 sucrose reward for 0.5 sec, and then once the pump stopped delivering fluid, no reward  
167 was delivered again for 2 sec. The next lick after the 2 sec interval would initiate the next  
168 pump activation. Licks during the 2 sec inter-pump interval were *instrumental*.



169 Multi-Electrode Recordings

170           Electrophysiological recordings were made using a Plexon Multichannel Acquisition  
171 Processor (MAP; Plexon; Dallas, TX). Local field potentials were sampled on all electrodes  
172 and recorded continuously throughout the behavioral testing sessions using the Plexon  
173 system via National Instruments A/D card (PCI-DIO-32HS). The sampling rate was 1 kHz.  
174 The head-stage filters (Plexon) were at 0.5 Hz and 5.9 kHz. Electrodes with unstable  
175 signals or prominent peaks at 60 Hz in plots of power spectral density were excluded  
176 from quantitative analysis.

177 Reversible Inactivation

178           Animals were tested with muscimol infusions in one hemisphere and recordings of  
179 neural activity in the opposite hemisphere. For control sessions, phosphate-buffered  
180 saline (PBS) was infused into MFC. The next day, muscimol (Sigma-Aldrich, St Louis, MO)  
181 was infused at 0.1 µg/µl. Infusions were performed by inserting a 33-gauge injector into  
182 the guide cannula, and 1.0 µl of fluid was delivered at a rate of 15 µl per h (0.25 µl per  
183 min) with a syringe infusion pump (KDS Scientific, Holliston, MA). The injector was  
184 connected to a 10 µl Hamilton syringe via 0.38 mm diameter polyethylene tubing. After  
185 infusion was finished, the injector was left in place for at least 4 min to allow for diffusion  
186 of the fluid. The injector was slowly removed and the headstage cable was subsequently  
187 plugged into the animal's implant. Rats were tested in the instrumental Shifting Values  
188 Licking Task 1 hour after the PBS or muscimol infusions. Recordings were made the day  
189 following the infusion session without any manipulation to verify recovery from the  
190 inactivation session.

191 *Histology*

192       After all experiments were completed, rats were deeply anesthetized via an  
193 intraperitoneal injection of Euthasol (100mg/kg) and then transcardially perfused using  
194 4% paraformaldehyde in phosphate-buffered saline. Brains were cryoprotected with a  
195 20% sucrose and 10% glycerol mixture and then sectioned horizontally on a freezing  
196 microtome. The slices were mounted on gelatin-subbed slides and stained for Nissl  
197 substance with thionin.

198 **Statistical Analysis**

199 *Software and Testing*

200       All data were analyzed using GNU Octave (<https://www.gnu.org/software/octave/> ),  
201 Python (Anaconda distribution: <https://www.continuum.io/>), and R ([https://www.r-](https://www.r-project.org/)  
202 [project.org/](http://jupyter.org/)). Analyses were run as Jupyter notebooks (<http://jupyter.org/>). Statistical  
203 testing was performed using standard (base) packages for R. Standard non-parametric  
204 tests and paired t-tests were used throughout the study. Repeated-measures ANOVA (with  
205 the error term due to subject) were used to compare data across training sessions (Figure  
206 7), reinforced versus non-reinforced licks (Figure 9), and PBS versus muscimol (Figure 10).  
207 Computer code used in this study is available upon request from the corresponding  
208 author.

209 *Data Analysis: Behavioral Measures of Licking*

210       The average licking frequency for each rat was calculated by obtaining the inverse  
211 of the median inter-lick interval (ILI) across the behavioral session. Variability in this  
212 measure was estimated using the inter-quartile range.

213 To normalize the number of licks emitted in different reinforced or non-reinforced  
214 contexts that had different time lengths, licks per unit time (as represented in Figure 9B)  
215 were calculated by dividing the number of licks in each context by the actual amount of  
216 time spent in each context across the session. This was done by finding the sum of times  
217 between each context, and then subtracting from that time the amount of time of fluid  
218 delivery over the entire session.

219 Duration of licking bouts were detected, as in Parent et al., 2015a,b). Bouts of licks  
220 were defined as having at least three licks within 300 ms and with an inter-bout interval  
221 of 0.5 s or longer.

#### 222 Data Analysis: Local Field Potentials

223 Electrophysiological data were first briefly assessed in NeuroExplorer  
224 (<http://www.neuroexplorer.com/>). Subsequent processing was done using signal  
225 processing routines in GNU Octave. Analysis of LFP data was carried out using the EEGlab  
226 toolbox (<http://sccn.ucsd.edu/EEGlab/>) (Event-Related Spectral Power and Inter-Trial  
227 Coherence) and Neurospec 2.0 (<http://www.neurospec.org/>) (spike-lick and spike-field  
228 coherence). Circular statistics were calculated using the *circular* library for R (Agostinelli  
229 and Lund, 2013). Graphical plots of data were made using the *matplotlib* and *seaborn*  
230 library for Python. Analyses were typically conducted in Jupyter notebooks, and  
231 interactions between Python, R, and Octave were implemented using the *rpy2* and  
232 *oct2py* libraries for Python.

233 To measure the amplitude and phase of LFP in the frequency range of licking, LFPs  
234 were bandpass-filtered using EEGlab's *eegfilt* function, with a fir1 filter (Widmann &  
235 Schröger, 2012), centered at the rat's licking frequency (licking frequency  $\pm$  inter-quartile

236 range; typically around 4 to 9 Hz), and were subsequently z-scored. Analyses were  
237 performed with a pre/post window of 2 sec, to capture effects at low frequencies, and the  
238 Hilbert transform was used to obtain the amplitude and phase of the LFP.

239 To measure the consistency of LFP phase angles in relation to licking, 500 licks were  
240 randomly chosen from one session from each rat along with 500 random time points that  
241 were chosen based on shuffling the inter-lick intervals from all licks in the rat's session.  
242 After creating peri-event matrices from filtered and z-scored LFP data, the Hilbert  
243 transform was applied to obtain the phase angle and amplitude for each electrode, and  
244 analyzed with routines from the *circular* library for R. *rho.circular* was used to obtain  
245 mean resultant vector length. *mean.circular* was used to obtain average phase. The  
246 *rao.spacing.test* function was used to obtain Rao's statistic and corresponding p-value,  
247 which indicates if phase angles were uniformly distributed.

248 For time-frequency analysis (ERSP and ITC), LFPs were preprocessed using EEGLab's  
249 *eegfilt* function with a fir1 filter and bandpass filtered from 0 to 100 Hz. For group  
250 summaries, ERSP and ITC matrices were z-scored for that given rat after bandpass  
251 filtering the data. Peri-lick matrices were then formed by using a pre/post window of 2 sec  
252 on each side, and the *newtimef* function from the EEGLab toolbox was used to generate  
253 the time-frequency matrices up to 30 Hz. Plots of ERSP and ITC matrices were made using  
254 a narrow time window (~0.5 sec) to focus on effects over several inter-lick intervals.  
255 Group summaries for ERSP and ITC were performed by obtaining the peak ITC value  
256 within a time window of  $\pm 2$  interlick intervals (typically  $\sim \pm 375$  ms) around licking, and  
257 obtaining the peak ERSP value within that same window. Each electrode's peak ERSP and  
258 ITC value for each type of lick (high-value or low-value lick) were used in the ANOVAs for  
259 group summaries. Finally, a "value index" was calculated to assess differences in ERSP

260 and ITC measures associated with consumption of the higher and lower value rewards,  
261 i.e.,  $(ITC_{Hi} - ITC_{Lo})/ITC_{Hi}$ .

262 Shuffling methods were used to compare ERSP and ITC values for observed and  
263 shuffled licks (obtained by calculating inter-lick intervals, shuffling their trial order, and  
264 adding the intervals to the first lick in each behavioral session). This gave a set of  
265 surrogate licks with random timing unrelated to the animal's behavior. Subsets of 50 licks  
266 and shuffled events were randomly chosen from each behavioral session and ERSP and  
267 ITC statistics were calculated for the subsets of observed and shuffled data. Shuffling was  
268 used to assess synchronous (theta) and asynchronous (delta) frequency ranges in the  
269 ERSP and ITC analyses (see Figure 5). However, statistical comparisons of ERSP and ITC  
270 values were made using raw spectral values.

271 Given the imbalance in the number of higher and lower value licks across the  
272 periods of learning and in the later testing sessions, all results were verified with  
273 subsampled sets of licks that were matched to the less represented condition (the square  
274 root of the less represented type) as well as using just 50 licks per type. Effects were  
275 consistent across these measures. Effects were also validated using the first 5 and 10  
276 minutes of each testing condition, which were equivalent to effects across the entire  
277 session. To further assess the stability of the ERSP and ITC measures over the test  
278 sessions, the data sets were broken into 10 blocks with equal numbers of licks or equal  
279 amounts of time into the session. Peak ERSP and ITC values were calculated for  
280 frequencies between 4 and 12 Hz and within two inter-lick intervals around each lick.  
281 Summaries for each rat used grand average LFPs (z-scored). Plots of peak ERSP and ITC  
282 over the two types of blocks (licks, time) revealed no consistent cross-session effects,  
283 e.g., due to satiety (de Araujo et al., 2006; Bouret and Richmond, 2010), for both

284 measures of neuronal activity (see Figure 6).

### 285 Data Analysis: Spike Activity

286 Exploratory analysis of on-line identified single units found that spike probabilities  
287 at the times of the licks were below 0.1 for all single units recorded in the task. Therefore,  
288 we used multi-unit activity [MUA] to relate spike activity to the animals' lick cycles and  
289 related LFP signals. MUA was identified using the Plexon Offline Sorter v. 4.3 (Plexon,  
290 Dallas, TX). All recorded spike waveforms were thresholded ( $\pm 2.7$  times the standard  
291 deviation for the collection of waveforms) and "automatic artifact invalidation" was  
292 applied. Then, using routines in NeuroExplorer v. 5 (Nex Technologies, Madison, AL), we  
293 measured spike probabilities for all recorded MUAs around the higher and lower values  
294 licks, using 0.001 sec bins. Spike probabilities were compared for the two lick values  
295 using a paired t-test (in R). To measure Spike-Field Coherence [SFC], we also used  
296 routines (sp2a\_m) from Neurospec 2.0 (<http://www.neurospec.org/>), and analyzed  
297 bandpass filtered LFP (licking frequency  $\pm$  inter-quartile range) and the following  
298 parameters: Segment power = 10 (1024 points, frequency resolution: 0.977 Hz), Hanning  
299 filtering with 50% tapering, and line noise removal for the LFPs at 60 Hz. To measure  
300 Spike-Lick Coherence [SLC], we used routines (sp2\_m1.m) from Neurospec 2.0. The  
301 following parameters were used: Segment power = 12 (4096 points, frequency  
302 resolution: 0.244 Hz) and Hanning filtering with 50% tapering.

### 303 **Validation of cross-hemispheric connectivity using retrograde tracers**

304 The methods for stereotaxic surgery that are described above were used to make  
305 injections of Cholera Toxin subunit B in 5 rats to validate cross-hemispheric connections

306 within the rostral MFC, which have not been extensively studied in previous anatomical  
307 studies on the most rostral part of this cortical region (cf. Gabbott et al., 2003; Hoover  
308 and Vertes, 2007). The CTB had an Alexa Fluor 488 reporter from Molecular Probes and  
309 was injected at a 1% concentration and 400 nl volume. A 10  $\mu$ l glass Hamilton syringe  
310 and Narishige motorized microinjector (IMS-10) was used. 10 min was allowed for  
311 diffusion after each injection. Brains were extracted using the methods described above  
312 for euthanasia and perfusion. Cortical slices were cut in the frontal plane using a freezing  
313 microtome and were imaged on fluorescent microscope (BX-51-F, Tritech Research, Los  
314 Angeles, CA) using an R1 camera and Ocular software from Qimaging (Surrey, BC).

## 315 **Results**

### 316 **Multi-electrode recordings in the Shifting Values Licking Task**

317 To investigate the role of the frontal cortex in reward-related consummatory  
318 behaviors, we assessed licking behavior in rats while performing simultaneous recordings  
319 in the rostral MFC. We trained rats in the Shifting Values Licking Task (Parent et al.,  
320 2015a), in which they licked at a drinking spout to receive 0.025 ml of a liquid sucrose  
321 reward (Figure 1A). The reward value of the fluid switched between higher (20% sucrose  
322 wt/vol) and lower (2 or 4%) levels every 30 sec. Experienced rats (>3 training sessions)  
323 licked more for the high-value reward compared to the low-value reward (Figure 1B;  
324 paired t-test between high-value and low-value licks:  $t_{(8)} = 4.29$ ,  $p = 0.0026$ ).

325 Eleven rats were implanted with multi-electrode arrays (Figure 2A). The placement  
326 of electrodes is shown in Figure 2B. All electrodes were placed in the medial agranular  
327 and prelimbic areas. In four of the rats, a drug cannula was also implanted in the opposite  
328 hemisphere using the same stereotaxic coordinates. These animals were used to examine

329 effects of reversible inactivation of the MFC without shutting down local neuronal activity.  
330 To confirm that cross-hemispheric connections exist within the rostral MFC region, 5 rats  
331 were injected with Cholera Toxin subunit B in the region where the neuronal recordings  
332 and reversible inactivations were made (Figure 2C).

### 333 **Quantification of lick-entrained rhythmic activity**

334 We recorded 161 local field potentials [LFPs] from the MFC in 11 rats as they  
335 ingested liquid sucrose in the Shifting Values Licking Task. An example of licking-related  
336 fluctuations in the LFPs is shown in Figure 3A. To measure entrainment between LFPs and  
337 the animal's licking, we bandpass filtered the LFPs around the licking frequency and used  
338 the Hilbert transform to extract the amplitude and phase of the peri-lick rhythm (left plots  
339 in Figure 3B). The phase of LFPs was plotted using polar histograms (right plot in Figure  
340 3B).

341 To quantify relationships between licking and LFP phase, we used circular statistics  
342 to measure the consistency of the phase angles at the time of licks. We used Rao's  
343 spacing test for uniformity, which assesses the directional spread of circular data. Two  
344 LFPs did not have major power in the 6-12 Hz range (see next page) and were excluded  
345 from this analysis. We plotted each electrode's location in MFC and shaded the locations  
346 by the intensity of the Rao statistic (Figure 4A). Phase entrainment to the lick cycle was  
347 concentrated in three longitudinal zones within the prelimbic cortex (0 to 1 mm lateral  
348 the midline), the medial agranular cortex ("M2") (1 to 1.5 mm lateral to the midline), and  
349 a the border of the medial and lateral agranular cortex (2 to 2.5 mm lateral to the  
350 midline). Examples of entrainment at four electrodes (from four different rats) located in  
351 each extreme of MFC space (rostral/lateral, rostral/medial, caudal/lateral, and



352 caudal/medial) are shown in Figure 4B.

353 Remarkably, the LFPs as a population had a mean phase angle near 0 degrees, i.e.,  
354 at the peak or trough of the neural oscillation (Figure 4C). This distribution was entirely  
355 distinct compared to population summaries based on surrogate data (i.e., “licks” derived  
356 from shuffled inter-lick intervals). Therefore, the MFC region as a whole showed a  
357 relatively similar phase that is suggestive of phase entrainment to the lick cycle.

358 To examine effects of licking on MFC across spectral frequencies, we used standard  
359 time-frequency analysis measures (EEGlab toolbox: Delorme and Makeig, 2004). Lick-  
360 related changes in spectral power across frequencies between 0 and 100 Hz were  
361 measured using Event-Related Spectral Power [ERSP] (Figure 5A). Phase consistency at  
362 the times of the licks was measured using Inter-Trial Coherence [ITC] (Figure 5B). For each  
363 LFP recording, we measured the frequency with the highest level of ERSP and ITC. Most  
364 LFPs (127 of 161) showed peak ERSP in the delta range (1-4 Hz). Most LFPs (104 of 161)  
365 showed peak ITC near the licking frequency, between 5.8 and 7 Hz. Some LFPs showed  
366 peak ITC near 8 Hz (N=27) or between 8 and 12 Hz (N=28). The LFPs with higher  
367 frequencies for peak ITC were recorded on common arrays, and our finding of variability  
368 among peak ITC frequencies might reflect differences in cortical layer or field, but we  
369 were unable to address these issues completely in the present study. The vast majority of  
370 LFPs (159 of 161) showed peak ITC at the time of licking between 5.8 and 12 Hz, and so  
371 we describe this frequency range as 6-12 Hz theta throughout the manuscript.

372 To determine if the spectral ERSP and ITC measures were synchronous with the lick  
373 cycle, or simply elevated during periods of licking but not time-locked to the actual licks  
374 (asynchronous), we created surrogate data by shuffling inter-lick intervals. This analysis  
375 provided evidence for both measures, ERSP and ITC, being elevated at the licking

376 frequency in shuffle-corrected plots of ERSP and ITC (right panels in Figure 5A,B). This  
377 finding, together with the analysis using circular statistics described above, is strong  
378 evidence for an entrainment of 6-12 Hz theta activity in the MFC being entrained to the  
379 lick cycle.

380 As a previous study reported that consummatory-related activity in the MFC is  
381 sensitive to satiety (Bouret and Richmond, 2010; see also de Araujo et al., 2006 for  
382 related findings on the rodent orbitofrontal cortex), we examined if there were cross-  
383 session effects within our data sets that could reflect effects of satiey. We checked for  
384 stability in licking-related ERSP and ITC levels over the behavioral sessions by dividing  
385 licks into 10 blocks with either equal numbers of licks or equal amounts of time in the  
386 session. Peak levels of ERSP and ITC between 4 and 12 Hz and within one inter-lick  
387 interval around each lick were measured over the blocks. No obvious pattern indicating  
388 satiation was apparent in this analysis (ITC results are shown in Figure 6). This analysis  
389 suggests that entrainment of MFC activity to the lick cycle does not reflect satiety or  
390 other cross-session factors.

### 391 **Theta entrainment to licking develops with experience**

392 In a subset of three rats, we recorded neuronal activity as the animals learned to  
393 perform the Shifting Values Licking Task (Figure 7). Over the first four days of training, the  
394 rats showed increased licking when the higher value reward was available relative to  
395 licking for the lower value option (Figure 7A). Repeated measures ANOVA found a main  
396 effect of reward value on licking ( $F_{(1,14)}=32.20$ ,  $p=5.7\times 10^{-5}$ ). Tukey's *post hoc* test found  
397 evidence for a difference between the number of licks for the high-value versus low-value  
398 reward in session 4 ( $p=0.013$ ), but not session 1 ( $p=0.935$ ). Also, median inter-lick

399 intervals (ILIs) were reduced from session 1 to session 4 (Wilcoxon rank-sum test from  
400 three rats individually:  $p < 10^{-6}$ ), indicating that rats increased their licking frequency with  
401 experience in the task.

402       Entrainment to licking developed over the training sessions, with clear lick-related  
403 oscillatory patterns apparent in the LFPs by the fourth training session (Figure 7B). Event-  
404 related potentials were larger for licks that delivered the higher value sucrose reward  
405 (blue lines in Figure 7B). The spectral content of the signals was evaluated using the  
406 same ERSP and ITC analyses used in Figures 5 and 6. Notably, there was a distinction  
407 between high-value and low-value phase-locking to the onset of licking evident in LFP  
408 data from session 4, but this signal was not apparent during session 1 (Figure 7C). To  
409 capture effects of the different sucrose concentrations on the LFPs, we calculated a  
410 “value index” for each electrode (Figure 7D). This index was derived from difference  
411 between the peak ITC level for the high and low-value licks divided by the peak ITC level  
412 for the high-value licks. All electrodes from all rats showed an increase in this index, a  
413 result that indicates increased differences in phase-locking for two amounts of reward  
414 over the period of training (paired t-test:  $t(39) = -12.085$ ,  $p < 10^{-6}$ ).

415       To further measure changes in the signals associated with the two reward values  
416 over sessions, we performed a repeated-measures ANOVA with the peak ITC values as the  
417 dependent variable and the values of the licks and the training sessions as predictors.  
418 This analysis found a significant interaction between session and value ( $F_{(1,155)} = 22.43$ ,  
419  $p < 10^{-6}$ ), and Tukey's *post hoc* test found evidence for differences between session 1  
420 versus session 4 high-value lick ITC values ( $p = 0.0016$ ). While these analyses found  
421 evidence for significant difference between ITC levels for the high and low-value licks in  
422 session 1 ( $p = 0.0093$ ), the difference between ITC levels was much greater in session 4

423 ( $p < 10^{-6}$ ).

424 We also assessed changes in LFP power by performing the same type of repeated-  
425 measures ANOVA, using peak ERSP values as the dependent variable. There was a  
426 significant interaction between session and reward value ( $F_{(1,155)}=9.991$ ,  $p=0.0019$ ).  
427 Tukey's *post hoc* analyses showed a difference in power from session 1 to session 4 high-  
428 value licks ( $p=3.5 \times 10^{-4}$ ), as well as power for session 4 high and low-value licks  
429 ( $p=4.3 \times 10^{-5}$ ). There was no difference in power between session 1 high-value and low-  
430 value licks ( $p=0.99$ ). These findings are evidence for learning-dependent changes in the  
431 theta entrainment by the event-related power (ERSP) and phase (ITC) to the lick cycle.

#### 432 **MFC spike activity is entrained to the lick cycle**

433 Simultaneous recordings of spike activity in the three rats tested during the final  
434 learning session showed evidence for spike entrainment to the lick cycle (Figure 8A). The  
435 probability of spiking at the times of licks was below 0.1 for all isolated single-units.  
436 Therefore, we re-isolated multi-unit activity [MUA] ( $N=44$ ) for the analyses reported here  
437 and measured the probability of spiking at the times of the higher-value and lower-value  
438 licks. Spikes were more likely to be coincident with the higher-value licks ( $0.113 \pm 0.013$ ,  
439 mean  $\pm$  sd) compared to the lower-value licks ( $0.092 \pm 0.009$ ) for 33 of 44 spike recordings  
440 (Figure 8B; paired t-test:  $t(43)=-3.78$ ,  $p=0.00047$ ).

441 Spike-lick coherence was used to further analyze synchronization between spikes  
442 and the higher and lower value licks. Results were complicated (and thus not shown  
443 graphically), with spikes having major peaks at various frequencies in the beta and  
444 gamma ranges, and spike-lick coherence often being significant in those ranges. 33 of 44  
445 units (75%) fired in phase with the higher value licks. 19 units (43%) fired in phase with

446 licks that delivered the lower value fluid. Over all recordings, the level of spike-lick  
447 coherence was greater for the higher value licks compared to the lower value licks  
448 (paired t-test:  $t(43)=4.6$ ,  $p<0.001$ ).

449 A much simpler result was obtained by using spike-field coherence to examine  
450 synchronization between the spikes and fields (Figure 8C). All 44 MUA recordings  
451 exhibited significant levels of spike-field coherence at the licking frequency (lower left  
452 plot in Figure 8C). Interestingly, phase was uniformly near  $-II$  for these datasets (lower  
453 right plot in Figure 8C), indicating that spikes and fields were explicitly out of phase  
454 (antiphase). Together, these results suggest that the lick-entrained theta rhythmic  
455 activity as measured in the LFPs was also manifest in lick-entrained spike activity within  
456 the rostral MFC.

#### 457 **Reward context, not reinforcement, drives licking-related theta entrainment**

458 The signals described above could reflect the expected reward magnitude (van  
459 Durren et al., 2008) and/or the taste or fluid properties of the ingested solutions (Jezzini  
460 et al., 2013). To examine these issues, we modified the Shifting Values Licking Task to  
461 include a 2-sec period of non-reinforced licking between periods of reward delivery  
462 (Figure 9A). This procedure resulted in rats continuously licking at the spout during the  
463 non-reinforced blocks of the task. Six rats were tested in the procedure with neuronal  
464 recordings, and the occurrence of licking in each context (Licks per unit time) was  
465 analyzed by calculating the number of licks in each context divided by the actual time  
466 spent in each context across the session (Figure 9B). All rats continued to lick more  
467 during these non-reinforced blocks when they could receive the high-value fluid  
468 compared to when they could receive the low-value fluid ( $t_{(5)} = 5.20$ ,  $p=0.0003$  for all

469 high-value context licks against all low-value context licks;  $t_{(5)}=5.63$ ,  $p=0.0025$  for non-  
470 reinforced high-value context licks versus non-reinforced low-value context licks;  
471  $t_{(5)}=3.31$ ,  $p=0.0213$  for reinforced high-value context licks versus reinforced low-value  
472 licks).

473 LFP signals synchronized to reinforced and non-reinforced licks were similar, with  
474 the main differences between high-value licks and low-value licks still evident, despite  
475 the rats not being rewarded during the non-reinforced blocks. Figures 9C and D show  
476 group summaries of the differences in peak ERSP and ITC values at the onset of the  
477 reinforced and non-reinforced high-value licks. (We chose to focus on the high-value licks  
478 for the analyses due to the increased number of high-value licks emitted during the task,  
479 though low-value licks also show the same effect.) There were no major differences in  
480 peak ERSP levels for reinforced and non-reinforced licks ( $F_{(1,359)}=2.52$ ,  $p=0.11$ ), which is  
481 also evident in the spectral plots from an example LFP recording shown in Figure 9E.

482 However, the majority (60 of 91) of the electrodes (from all rats) showed increases  
483 in ITC phase-locking values for the non-reinforced high-value licks (Figure 9D). We  
484 performed a repeated-measures ANOVA with factors for lick type (reinforced or non-  
485 reinforced) and reward value (high or low) with peak ITC values as the dependent  
486 variable. This analysis found evidence for a significant interaction between lick type and  
487 reward value ( $F_{(1,359)} = 31.94$ ,  $p < 10^{-6}$ ). The non-reinforced licks had slightly greater ITC  
488 values at the onset of licking (high-value reinforced licks = 0.48, SD = 0.069; high-value  
489 non-reinforced licks = 0.51, SD = 0.063), which was also confirmed using Tukey's *post*  
490 *hoc* test (reinforced versus non-reinforced high-value licks,  $p=0.0002$ ). Spectral plots,  
491 shown in Figure 9F, revealed modest increases in phase-locking for the non-reinforced  
492 high-value licks, and minimal differences in the phase-locking for the reinforced versus

493 non-reinforced low-value context licks.

494       These findings cannot easily be explained by how often the rats licked in each task  
495 context. If engagement in licking (vigor or intensity) explained the pattern of neural  
496 results, then we would have expected to find elevated ITC levels when the rats received  
497 liquid sucrose as well as when they made non-reinforced licks in the high-value blocks.  
498 However, ITC levels were not elevated when rats licked for the lower concentration of  
499 sucrose. We examined two other behavioral measures of licking to determine if the  
500 differences in ITC levels could be accounted for by a behavioral measure from the task.  
501 First, we examined the licking, frequency (based on inter-lick intervals) but found no  
502 differences between median inter-lick intervals (Mann-Whitney test:  $U_5=-0.3202$ ,  
503  $p=0.7487$ ) and the inter-quartile ranges for the inter-lick intervals ( $U_5=-1.4412$ ,  
504  $p=0.1495$ ) in the higher and lower reward contexts, findings that discount the role of the  
505 frequency of licking in explaining the ITC results. By contrast, when we examined the  
506 persistence of licking, using bout analysis (as in Parent et al., 2015a,b), we found clear  
507 differences in the duration of licking bouts in the higher ( $5.8003\pm 0.9278$  sec) and lower  
508 ( $1.6969\pm 0.3932$  sec) reward contexts ( $U_5=2.5621$ ,  $p=0.0104$ ). Bouts were on average  
509  $\sim 3.4$  times longer in the higher value contexts. As such, the differences in ITC levels  
510 across the higher and lower reward contexts were associated with the persistence with  
511 the rats licked in the two behavioral contexts, but not the vigor or frequency at which  
512 they licked. These findings suggests that reward expectation, rather than the properties  
513 of the delivered fluids, drives reward signaling in the rostral MFC.

#### 514 **Reward signaling depends on the medial frontal cortex**

515       Having established the MFC as signaling reward information through lick-entrained

516 neuronal rhythms, we carried out a reversible inactivation study to determine if the  
517 rhythmic activity is generated by neurons in the MFC. (Alternatively, the signals could be  
518 generated elsewhere and broadcast to the MFC.) We implanted four rats with a multi-  
519 electrode array in one hemisphere and a drug infusion cannula to allow for infusing  
520 muscimol in the MFC in the opposite hemisphere (Figure 2A). Cross-hemispheric  
521 inactivation was done to allow for recording distant effects of MFC perturbation, and not  
522 the effects of a local shutdown of neuronal activity. Two of these rats had precisely  
523 aligned electrode arrays and drug cannula (same cytoarchitectural area and layer). Two  
524 other rats were not precisely aligned (e.g., cannula in superficial layers and array in deep  
525 layers), and electrophysiological data from those animals were not considered further. In  
526 all four rats, we did not observe any major behavioral change in the number of licks  
527 emitted after the unilateral muscimol infusions. There was a marginal decrease in the  
528 overall inter-lick intervals under muscimol (Mann-Whitney U test,  $p < 0.05$ ). There was no  
529 difference in bout durations for the high or low value licks between the saline and  
530 muscimol sessions ( $p > 0.05$  for all comparisons, Mann-Whitney U test). (This is in contrast  
531 to our previous study with bilateral inactivations (Parent et al., 2015a), which clearly alter  
532 performance of the task, including the persistence of licking bouts.) The lack of  
533 behavioral effects of muscimol allowed us to assess potential electrophysiological  
534 changes without overt effects of the inactivations on the animals' licking behavior.

535 In the two rats with aligned electrode arrays and drug cannulas, LFP activity during  
536 muscimol inactivations was dramatically altered. Muscimol infusions slightly decreased  
537 event-related potentials synchronized to licking (Figure 10A) and dramatically decreased  
538 event-related spectral power [ERSP] at the licking frequency (Figure 10B, all electrodes  
539 plotted from two rats). This was confirmed in the spectral plots, shown from one example



540 electrode from one rat (Figure 10D). A repeated measures ANOVA on peak ERSP values  
541 around the onset of licking found evidence for decreased power at lick-onset between the  
542 saline and muscimol sessions ( $F_{(1,123)} = 96.09, p < 10^{-6}$ ). Muscimol infusions also decreased  
543 the lick-entrained phase-locking in the theta frequency range. As seen in Figure 10C, 28  
544 of 32 electrodes showed decreased phase-locking around the onset of licking. A repeated  
545 measures ANOVA found evidence for difference in ITC values for the saline and muscimol  
546 sessions ( $F_{(1,123)} = 18.17, p = 3.9 \times 10^{-5}$ ). Spectral plots from an example electrode (Figure  
547 10E) show diminished phase coherence in the theta frequency range for the high-value  
548 licks. The decrease in phase-locking therefore disrupted the previously evident  
549 differential signaling of high and low value sucrose rewards. Together, this inactivation  
550 study established that the theta-entrained activity described throughout this study, and  
551 also reported for single-value water rewards in Horst and Laubach (2013), are generated  
552 by neurons in the rostral MFC.

## 553 **Discussion**

### 554 **Dynamics of reward-related activity in the MFC**

555 The main idea of this study was that rodents lick to consume rewarding fluids and  
556 reward information is therefore likely to be encoded in a dynamic manner, in phase with  
557 the animal's lick cycle. Initial evidence for this idea was reported by Horst and Laubach  
558 (2013), who found MFC neurons that were selectively activated when thirsty rats initiated  
559 bouts of licking to consume water. The present study was designed to further examine  
560 the dynamics of reward-related activity in the MFC as rats ingested varying levels of  
561 liquid sucrose during a MFC-dependent incentive-contrast licking task (Parent et al.,  
562 2015a,b). Multi-electrode recordings were made in the rostral MFC as rats consumed

563 relatively higher and lower value rewards that were available in alternating periods of 30  
564 sec (Figures 1 and 2). We found that the entrainment of MFC spikes and field potentials  
565 to the animals' lick cycle varied with the concentration of liquid sucrose that was  
566 ingested (Figures 3-6 and 8). These signals were distributed broadly throughout the  
567 rostral part of the MFC (Figure 4A). Spectral methods showed that these effects were  
568 selective to the 6-12 Hz theta range, which also encompasses the animals' licking  
569 frequency (right plots in Figure 7C). We further examined if theta-entrained activity to the  
570 lick cycle is stable across the testing sessions (Figure 6), develops with experience (Figure  
571 7), does not depend on the presence of the rewarding fluids (Figure 9), and depends on  
572 processing by MFC neurons (Figure 10).

573         The differential expression of lick-entrained MFC theta might reflect the reward  
574 value of the ingested fluids and/or the vigor or persistence with which rats lick to  
575 consume the fluids. As the rostral MFC is known to have extensive interconnections with  
576 the "gustatory" insular cortex (Gabbott et al., 2003), MFC reward coding might reflect  
577 differences in the tastes or fluid properties of the sucrose solutions. Alternatively, the  
578 rostral MFC projects to a number of orolingual motor areas (Yoshida et al., 2009; Haque et  
579 al., 2010; Iida et al., 2010) and could mediate cortical control over the vigor (intensity per  
580 unit time) or persistence (bout structure) of licking. To examine these issues, we modified  
581 the task to have periods of non-reinforced licking between each reward delivery (Figure  
582 9). If the presence of fluids drives MFC signaling, then differences in MFC activity should  
583 only occur when the animals were actively ingesting the fluids. Surprisingly, this  
584 experiment revealed that the theta-entrained activity persisted beyond the period of  
585 reward delivery (Figure 9), and was selectively elevated when the rats licked in the high-  
586 value blocks of the task without regard to reinforcement. These neuronal signals were

587 associated with differences in the duration of licking bouts, with bouts being ~3.4 times  
588 longer in the high-value blocks compared to the low-value blocks (see Results). The  
589 duration of licking bouts is classically interpreted as a measure of the palatability, or  
590 subjective value, of rewarding solutions (Davis and Smith, 1992). However, in our task  
591 design, the intervening periods of non-reinforced licking did not deliver liquid sucrose to  
592 the rats. Therefore, we suggest that the elevated MFC theta associated with more  
593 persistent licking in the higher-value blocks might have reflected the animal's expectation  
594 of the higher-value reward. This interpretation should be verified in future studies, e.g.  
595 using shifts in sucrose concentration and fluid volume, which have opposing effects on  
596 the duration of licking bouts (Spector et al., 1998; Kaplan et al., 2001).

597 While the behavioral mechanisms mediating lick-entrained MFC theta will require  
598 new experiments to be resolved, our study was able to determine that the signals depend  
599 on MFC neurons. Reversible inactivation of the MFC (using muscimol) found evidence for  
600 MFC neurons being necessary for the generation of the lick-entrained signals (Figure 10).  
601 Perturbations of the MFC, made by infusing muscimol into the MFC in opposite  
602 hemisphere, dramatically attenuated lick-entrained MFC theta in the opposite  
603 hemisphere, directly implicating MFC neurons in the generation of the signals.

604 Together, our findings provide evidence for the MFC processing reward information  
605 in an action-centric manner ("the value of licking now") using signals that are  
606 synchronized to the lick cycle. Previous studies of MFC reward signaling have inferred  
607 value coding upon temporally sustained activity during the period of reward consumption  
608 (e.g. Luk and Wallis, 2009). Our findings suggest that neuronal activity in the rostral MFC  
609 is temporally sustained during the consumption of rewarding fluids because the animal is  
610 licking, and not because of the abstract properties of rewarding fluids.

## 611 **Frequency-specific entrainment to licking**

612 Two major rhythms were prevalent in our neuronal recordings. Power was elevated  
613 between 2-4 Hz (delta) throughout the performance of the task, but this frequency was  
614 not phase locked to the lick cycle (Figure 5). A second major rhythm, which was phase  
615 locked to the lick cycle, occurred between 6 and 12 Hz (theta) (Figure 5). The phase of  
616 this 6-12 Hz theta rhythm was consistent from lick to lick (Inter-Trial Coherence) and the  
617 strength of “phase-locking” was enhanced when rats consumed the higher value reward  
618 (Figure 7). Spike activity was coherent to this theta frequency range for all multi-unit  
619 recordings that were made simultaneously with the field potential recordings (Figure 8).  
620 Theta-range rhythms are a prominent feature of the frontal cortex across species  
621 (Cavanagh and Frank, 2014). In rodents, frontal theta signals represent information about  
622 behavioral outcomes and performance adjustment (Narayanan et al., 2013; Laubach et  
623 al., 2015), interval timing (Parker et al., 2014; Emmons et al., 2016), freezing during fear  
624 conditioning (Karalis et al., 2016), and consummatory action (Horst and Laubach, 2013).  
625 The results reported here suggest that frontal theta also has a role in reward processing.

## 626 **Orolingual aspects of MFC function**

627 The prominence of theta in rodent frontal cortex during consummatory behavior is  
628 interesting as rats naturally lick at frequencies between 6 and 8 Hz (Weijnen, 1998) and  
629 open/close their jaw in the 5-7 Hz range (Sasamoto et al., 1990). These behaviors are  
630 controlled by brainstem central pattern generators (CPGs) (Travers et al., 1997). Other  
631 orofacial behaviors such as chewing/mastication (Nakamura and Katakura, 1995),  
632 breathing, sniffing and whisking (Moore et al., 2013) also occur in a rhythmic manner and

633 are controlled by CPGs in the brainstem (Moore et al., 2014). These subcortical  
634 sensorimotor areas receive projections from the rostral MFC (Yoshida et al., 2009; Haque  
635 et al., 2010; Iida et al., 2010) and stimulation of rostral MFC has direct effects on orofacial  
636 movement (Brecht et al., 2004; Adachi et al., 2008) and breathing (Hassan et al., 2013).  
637 In light of these studies, we propose that one potential function of the rostral MFC might  
638 be that it serves as “cingulate motor area” (Shima and Tanji, 1998) controlling orolingual  
639 actions and the synchronization between MFC activity and the lick cycle might allow MFC  
640 to monitor the consequences of consumption in a temporally precise manner.

#### 641 **Lick-entrained theta is generated by MFC neurons**

642 Unilateral reversible inactivations decreased theta phase tuning (Figure 10C,E) in  
643 the opposite hemisphere, established that these signals depend on neurons within the  
644 MFC. Our inactivations were done unilaterally and there were no overt behavioral  
645 changes to the animals’ licking behavior during the inactivation sessions. This is in strong  
646 contrast to bilateral inactivations of the same cortical area which temporally fragments  
647 licking and eliminates the expression of learned incentive contrast effects in the task  
648 (Figures 3 and 7 in Parent et al., 2015a). It is not uncommon for unilateral cross-  
649 hemispheric inactivations to show less dramatic effects on behavior (Ambroggi et al.,  
650 2008), and it was necessary for our interpretations to have the rats maintain their  
651 behavior without normal MFC function. Our findings from the inactivation study bolster  
652 evidence for a role of MFC in generating theta signals that are synchronized to the lick  
653 cycle, in addition to more distal sources such as the olfactory system (Fontainini and  
654 Bower, 2006) and hippocampus (Paz et al. 2008).

655 **Conclusion**

656         We have shown a role for theta rhythmic activity generated in the rostral part of the  
657 rat medial frontal cortex in tracking the act of consumption of liquid sucrose rewards. If  
658 these signals encode relative reward value or enable comparisons among different  
659 rewards, then they could enable control over food-based decisions and self control over  
660 eating. New experiments are needed to investigate these issues. In any case, our findings  
661 have clinical implications for diseases associated with MFC dysfunction, e.g.  
662 understanding anhedonia in psychiatric diseases such as depression and schizophrenia  
663 (Gorwood, 2008) and the loss of control over food intake in obesity (Volkow et al., 2011)  
664 and eating disorders such as anorexia (Uher et al., 2004). Our findings also raise an  
665 alternative interpretation for studies that have reported reward magnitude coding in the  
666 MFC without measuring or accounting for the effects of consummatory behavior on  
667 neuronal activity.

## 668 **References**

- 669 Adachi, K., Murray, G. M., Lee, J.-C., & Sessle, B. J. (2008). Noxious Lingual Stimulation  
670 Influences the Excitability of the Face Primary Motor Cerebral Cortex (Face MI) in  
671 the Rat. *Journal of Neurophysiology*, *100*(3), 1234–1244.
- 672 Agostinelli, C., & Lund, U. (2013). R package 'circular': Circular Statistics (version 0.4-7).  
673 URL <https://r-forge.r-project.org/projects/circular/>
- 674 Ambroggi, F., Ishikawa, A., Fields, H. L., & Nicola, S. M. (2008). Basolateral Amygdala  
675 Neurons Facilitate Reward-Seeking Behavior by Exciting Nucleus Accumbens  
676 Neurons. *Neuron*, *59*(4), 648–661.
- 677 Amiez, C., Joseph, J. P., & Procyk, E. (2005). Reward Encoding in the Monkey Anterior  
678 Cingulate Cortex. *Cerebral Cortex*, *16*(7), 1040–1055.
- 679 Apicella P, Ljungberg T, Scarnati E, Schultz W. (1991) Responses to reward in monkey  
680 dorsal and ventral striatum. *Experimental Brain Research*, *85*(3), 491-500.
- 681 Boret, S., & Richmond, B. J. (2010). Ventromedial and Orbital Prefrontal Neurons  
682 Differentially Encode Internally and Externally Driven Motivational Values in  
683 Monkeys. *Journal of Neuroscience*, *30*(25), 8591–8601.
- 684 Brecht, M., Krauss, A., Muhammad, S., Sinai-Esfahani, L., Bellanca, S., & Margrie, T. W.  
685 (2004). Organization of rat vibrissa motor cortex and adjacent areas according to  
686 cytoarchitectonics, microstimulation, and intracellular stimulation of identified  
687 cells. *The Journal of Comparative Neurology*, *479*(4), 360–373.
- 688 Cai, X., & Padoa-Schioppa, C. (2012). Neuronal Encoding of Subjective Value in Dorsal and  
689 Ventral Anterior Cingulate Cortex. *Journal of Neuroscience*, *32*(11), 3791–3808.
- 690 Carelli, R.M., Deadwyler, S.A. (1994) A comparison of nucleus accumbens neuronal firing  
691 patterns during cocaine self-administration and water reinforcement in rats. *Journal*

- 692           of *Neuroscience*, 14(12), 7735-46.
- 693 Cavanagh, J. F., & Frank, M. J. (2014). Frontal theta as a mechanism for cognitive control.  
694           *Trends in Cognitive Sciences*, 18(8), 414-421.
- 695 Davis JD, Smith GP. (1992) Analysis of the microstructure of the rhythmic tongue  
696           movements of rats ingesting maltose and sucrose solutions. *Behav Neurosci*.  
697           106(1), 217-28.
- 698 de Araujo IE, Gutierrez R, Oliveira-Maia AJ, Pereira A Jr, Nicolelis MA, Simon SA. (2006)  
699           Neural ensemble coding of satiety states. *Neuron*, 51(4), 483-94.
- 700 Delorme A, Makeig S. (2004) EEGLab: an open source toolbox for analysis of single-trial  
701           EEG dynamics including independent component analysis. *Journal of Neuroscience*  
702           *Methods*, 134(1), 9-21.
- 703 Donnelly, N. A. *et al.* Oscillatory Activity in the Medial Prefrontal Cortex and Nucleus  
704           Accumbens Correlates with Impulsivity and Reward Outcome. *PLoS ONE* 9,  
705           e1111300 (2014).
- 706 Emmons, E. B., Ruggiero, R. N., Kelley, R. M., Parker, K. L., & Narayanan, N. S. (2016).  
707           Corticostriatal Field Potentials Are Modulated at Delta and Theta Frequencies  
708           during Interval-Timing Task in Rodents. *Frontiers in Psychology*, 7.
- 709 Fontanini, A., & Bower, J. M. (2006). Slow-waves in the olfactory system: an olfactory  
710           perspective on cortical rhythms. *Trends in neurosciences*, 29(8), 429-437.
- 711 Gabbott, P. L. ., Warner, T. A., Jays, P. R. ., & Bacon, S. J. (2003). Areal and synaptic  
712           interconnectivity of prelimbic (area 32), infralimbic (area 25) and insular cortices in  
713           the rat. *Brain Research*, 993(1-2), 59-71.
- 714 Glascher, J., Hampton, A. N., & O'Doherty, J. P. (2009). Determining a Role for  
715           Ventromedial Prefrontal Cortex in Encoding Action-Based Value Signals During



- 716           Reward-Related Decision Making. *Cerebral Cortex*, 19(2), 483–495.
- 717 Gorwood, P. (2008). Neurobiological mechanisms of anhedonia. *Dialogues in Clinical*  
718           *Neuroscience*, 10(3), 291–299.
- 719 Haque, T., Yamamoto, S., Masuda, Y., Kato, T., Sato, F., Uchino, K., ... Yoshida, A. (2010).  
720           Thalamic afferent and efferent connectivity to cerebral cortical areas with direct  
721           projections to identified subgroups of trigeminal premotoneurons in the rat. *Brain*  
722           *Research*, 1346, 69–82.
- 723 Hassan, S. F., Cornish, J. L. & Goodchild, A. K. Respiratory, metabolic and cardiac functions  
724           are altered by disinhibition of subregions of the medial prefrontal cortex: The  
725           prefrontal cortex and autonomic functions. *The Journal of Physiology*, 591, 6069–  
726           6088 (2013).
- 727 Hayden, B. Y., Pearson, J. M., & Platt, M. L. (2009). Fictive reward signals in the anterior  
728           cingulate cortex. *Science*, 324(5929), 948–950.
- 729 Hoover WB, Vertes RP. (2007) Anatomical analysis of afferent projections to the medial  
730           prefrontal cortex in the rat. *Brain Struct Funct.* 212(2), 149-79.
- 731 Horst NK, Laubach M. (2009) The role of rat dorsomedial prefrontal cortex in spatial  
732           working memory. *Neuroscience*. 164(2), 444-56.
- 733 Horst, N.K, & Laubach, M. (2012) Working with memory: evidence for a role for the medial  
734           prefrontal cortex in performance monitoring during spatial delayed alternation.  
735           *Journal of Neurophysiology*, 108(12), 3276-88.
- 736 Horst, N. K., & Laubach, M. (2013). Reward-related activity in the medial prefrontal cortex  
737           is driven by consumption. *Frontiers in Neuroscience*, 7(56).
- 738 Hu, H., Vervaeke, K., & Storm, J. F. (2002). Two forms of electrical resonance at theta  
739           frequencies, generated by M-current, h-current and persistent Na<sup>+</sup> current in rat

- 740 hippocampal pyramidal cells. *The Journal of Physiology*, 545(3), 783–805.
- 741 Iida, C., Oka, A., Moritani, M., Kato, T., Haque, T., Sato, F., ... Yoshida, A. (2010).  
742 Corticofugal direct projections to primary afferent neurons in the trigeminal  
743 mesencephalic nucleus of rats. *Neuroscience*, 169(4), 1739–1757.
- 744 Jezzini, A., Mazzucato, L., La Camera, G. & Fontanini, A. Processing of Hedonic and  
745 Chemosensory Features of Taste in Medial Prefrontal and Insular Networks. *Journal*  
746 *of Neuroscience*. 33, 18966–18978.
- 747 Kaplan JM, Baird JP, Grill HJ. (2001) Dissociation of licking and volume intake controls in  
748 rats ingesting glucose and maltodextrin. *Behav Neurosci*. 115(1), 188-95.
- 749 Karalis, N., Dejean, C., Chaudun, F., Khoder, S., Rozeske, R. R., Wurtz, H., ... Herry, C.  
750 (2016). 4-Hz oscillations synchronize prefrontal–amygdala circuits during fear  
751 behavior. *Nature Neuroscience*, 19(4), 605–612.
- 752 Laubach, M., Caetano, M. S., & Narayanan, N. S. (2015). Mistakes were made: Neural  
753 mechanisms for the adaptive control of action initiation by the medial prefrontal  
754 cortex. *Journal of Physiology-Paris*, 109(1-3), 104–117.
- 755 Levy, D. J., & Glimcher, P. W. (2011). Comparing Apples and Oranges: Using Reward-  
756 Specific and Reward-General Subjective Value Representation in the Brain. *Journal*  
757 *of Neuroscience*, 31(41), 14693–14707.
- 758 Luk, C.-H., & Wallis, J. D. (2009). Dynamic Encoding of Responses and Outcomes by  
759 Neurons in Medial Prefrontal Cortex. *Journal of Neuroscience*, 29(23), 7526–7539.
- 760 Moore, J. D., Deschênes, M., Furuta, T., Huber, D., Smear, M. C., Demers, M., & Kleinfeld,  
761 D. (2013). Hierarchy of orofacial rhythms revealed through whisking and breathing.  
762 *Nature*, 497(7448), 205-210.
- 763 Moore, J. D., Kleinfeld, D., & Wang, F. (2014). How the brainstem controls orofacial

- 764 behaviors comprised of rhythmic actions. *Trends in Neurosciences*, 37(7), 370–380.
- 765 Nakamura, Y., & Katakura, N. (1995). Generation of masticatory rhythm in the brainstem.  
766 *Neuroscience Research*, 23, 1–19.
- 767 Narayanan, N.S, Horst, N.K, Laubach, M. (2006) Reversible inactivations of rat medial  
768 prefrontal cortex impair the ability to wait for a stimulus. *Neuroscience*, 139(3),  
769 865-76.
- 770 Narayanan, N. S., & Laubach, M. (2006). Top-down control of motor cortex ensembles by  
771 dorsomedial prefrontal cortex. *Neuron*, 52(5), 921-931.
- 772 Narayanan, N. S., Cavanagh, J. F., Frank, M. J., & Laubach, M. (2013). Common medial  
773 frontal mechanisms of adaptive control in humans and rodents. *Nature*  
774 *Neuroscience*, 16(12), 1888–1895.
- 775 Padoa-Schioppa, C., & Assad, J. A. (2006). Neurons in the orbitofrontal cortex encode  
776 economic value. *Nature*, 441(7090), 223–226.
- 777 Paxinos G and Watson C (1997). Paxinos and Watson's The Rat Brain in Stereotaxic  
778 Coordinates, Third Edition. Elsevier Academic Press, San Diego.
- 779 Parent, M. A., Amarante, L. M., Liu, B., Weikum, D., & Laubach, M. (2015a). The medial  
780 prefrontal cortex is crucial for the maintenance of persistent licking and the  
781 expression of incentive contrast. *Frontiers in Integrative Neuroscience*, 9.
- 782 Parent, M. A., Amarante, L. M., Swanson, K., & Laubach, M. (2015b). Cholinergic and  
783 ghrelinergic receptors and KCNQ channels in the medial PFC regulate the  
784 expression of palatability. *Frontiers in Behavioral Neuroscience*, 9.
- 785 Parker, K. L., Chen, K.-H., Kingyon, J. R., Cavanagh, J. F., & Narayanan, N. S. (2014). D1-  
786 Dependent 4 Hz Oscillations and Ramping Activity in Rodent Medial Frontal Cortex  
787 during Interval Timing. *Journal of Neuroscience*, 34(50), 16774–16783.

- 788 Paz, R., Bauer, E. P., & Paré, D. (2008). Theta synchronizes the activity of medial  
789 prefrontal neurons during learning. *Learning & Memory*, *15*(7), 524-531.
- 790 Petykó, Z., Tóth, A., Szabó, I., Gálosi, R., & Lénárd, L. (2009). Neuronal activity in rat  
791 medial prefrontal cortex during sucrose solution intake: *NeuroReport*, *20*(14),  
792 1235-1239.
- 793 Petykó, Z., Gálosi, R., Tóth, A., Máté, K., Szabó, I., Szabó, I., ... Lénárd, L. (2015).  
794 Responses of rat medial prefrontal cortical neurons to Pavlovian conditioned stimuli  
795 and to delivery of appetitive reward. *Behavioural Brain Research*, *287*, 109-119.
- 796 Roesch, M., & Olson, C. (2004). Neuronal Activity Related to Reward Value and Motivation  
797 in Primate Frontal Cortex. *Science*, *304*(5668), 307-310.
- 798 Sasamoto, K., Zhang, G., & Iwasaki, M. (1990). Two types of rhythmical jaw movements  
799 evoked by stimulation of the rat cortex. *Japanese Journal of Oral Biology*, *32*(1), 57-  
800 68.
- 801 Shidara, M. & Richmond, B. J. Anterior Cingulate: Single Neuronal Signals Related to  
802 Degree of Reward Expectancy. *Science* *296*, 1709-1711 (2002).
- 803 Shima, K. & Tanji, J. Role for cingulate motor area cells in voluntary movement selection  
804 based on reward. *Science* *282*, 1335-1338 (1998).
- 805 Spector AC, Klumpp PA, Kaplan JM. (1998) Analytical issues in the evaluation of food  
806 deprivation and sucrose concentration effects on the microstructure of licking  
807 behavior in the rat. *Behav Neurosci.* *112*(3), 678-94.
- 808 Travers, J. B., Dinardo, L. A., & Karimnamazi, H. (1997). Motor and premotor mechanisms  
809 of licking. *Neuroscience & Biobehavioral Reviews*, *21*(5), 631-647.
- 810 Uher, R., Murphy, T., Brammer, M. J., Dalgleish, T., Phillips, M. L., Ng, V. W., ... & Treasure,  
811 J. (2004). Medial prefrontal cortex activity associated with symptom provocation in

- 812 eating disorders. *American Journal of Psychiatry*, 161(7), 1238-1246.
- 813 Van Duuren, E., Escámez, F. A. N., Joosten, R. N. J. M. A., Visser, R., Mulder, A. B., &  
814 Pennartz, C. M. A. (2007). Neural coding of reward magnitude in the orbitofrontal  
815 cortex of the rat during a five-odor olfactory discrimination task. *Learning &*  
816 *Memory*, 14(6), 446-456.
- 817 Volkow, N. D., Wang, G. J., & Baler, R. D. (2011). Reward, dopamine and the control of  
818 food intake: implications for obesity. *Trends in cognitive sciences*, 15(1), 37-46.
- 819 Watanabe, M. (1996). Reward expectancy in primate prefrontal neurons. *Nature*,  
820 382((6592), 629).
- 821 Widmann, A., & Schröger, E. (2012) Filter effects and filter artifacts in the analysis of  
822 electrophysiological data. *Frontiers in Psychology*, 3:233.
- 823 Weijnen, J. A. (1998). Licking behavior in the rat: measurement and situational control of  
824 licking frequency. *Neuroscience & Biobehavioral Reviews*, 22(6), 751-760.
- 825 Yoshida, A., Taki, I., Chang, Z., Iida, C., Haque, T., Tomita, A., ... Shigenaga, Y. (2009).  
826 Corticofugal projections to trigeminal motoneurons innervating antagonistic jaw  
827 muscles in rats as demonstrated by anterograde and retrograde tract tracing. *The*  
828 *Journal of Comparative Neurology*, 514(4), 368-386.

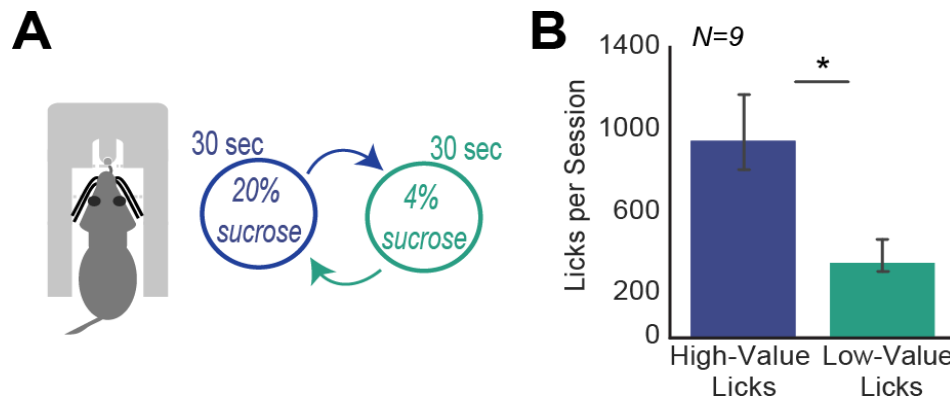

**Figure 1: Behavioral task.** A. Rats were tested in an incentive contrast procedure called the Shifting Values Licking Task (Parent et al., 2015a). They were required to lick on a spout to receive liquid sucrose rewards. Reward values shift between relatively high (20% wt/vol) and low (4% or 2% wt/vol) concentrations of sucrose every 30 sec. B. Experienced rats (fourth training session) licked more for the high-value sucrose than for the low-value sucrose (paired t-test;  $t(8) = 4.29$ ,  $p = 0.0026$ ).  $*p < 0.005$ .

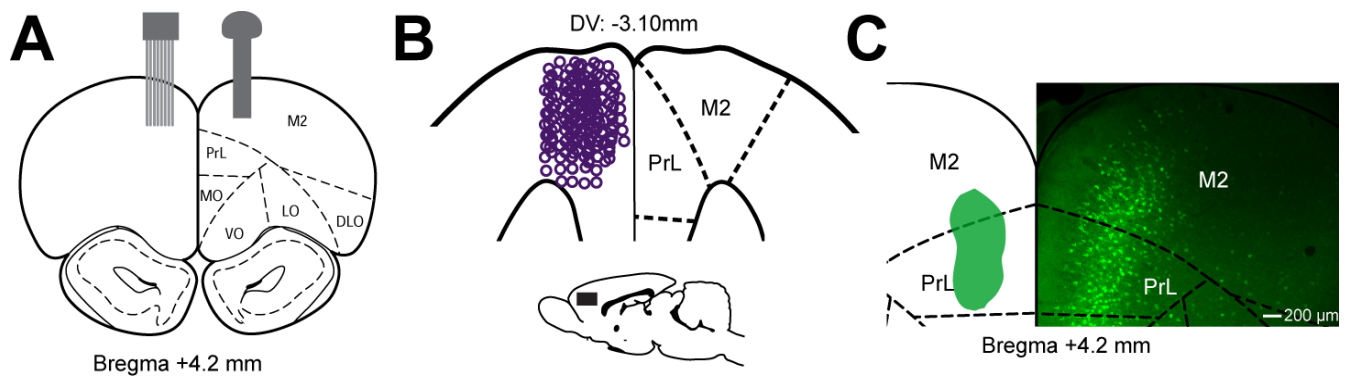

**Figure 2: Neuronal recordings.** A. All rats (N=11) were implanted with a 16-channel microwire array targeting the rostral medial frontal cortex [MFC] in one hemisphere. A subset of rats (N=4) had a drug cannula implanted in the same cortical area in the opposite hemisphere. B. Locations of recording sites are depicted on a horizontal section from the Paxinos and Watson (1997) atlas. All electrodes were placed within the prelimbic [PrL] and medial agranular [M2] regions. C. Validation of cross-hemispheric connections for this rostral MFC region. Cholera Toxin subunit B with the Alexa Fluor 488 reporter was injected in the rostral MFC of 5 rats. Injection site spread is schematically represented in green (left hemisphere). Neurons were labeled in the superficial layers in the opposite hemisphere (right).

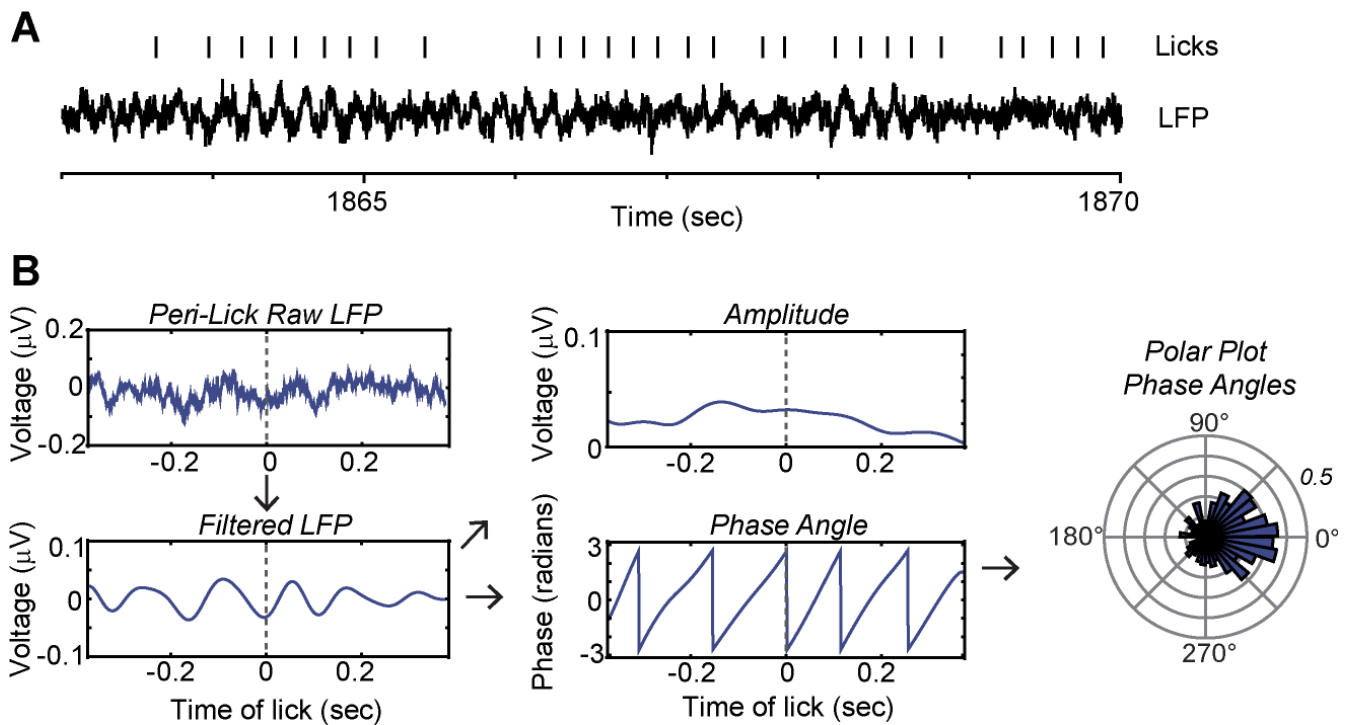

**Figure 3: Neuronal activity in the MFC is entrained to the lick cycle.** A. An example of a local field potential [LFP] recording shows clear fluctuations at the times of licks (tick marks above the LFP). B. Relationships between LFP signals and licking were assessed by bandpass filtering the LFPs near the licking frequency (defined by the interquartile range around the medial inter-lick interval) and applying the Hilbert transform to measure the amplitude and phase of licking-related neuronal activity. Instantaneous phase was plotted using polar coordinates and analyzed with standard methods for circular statistics (Agostinelli and Lund, 2013). See methods for details.



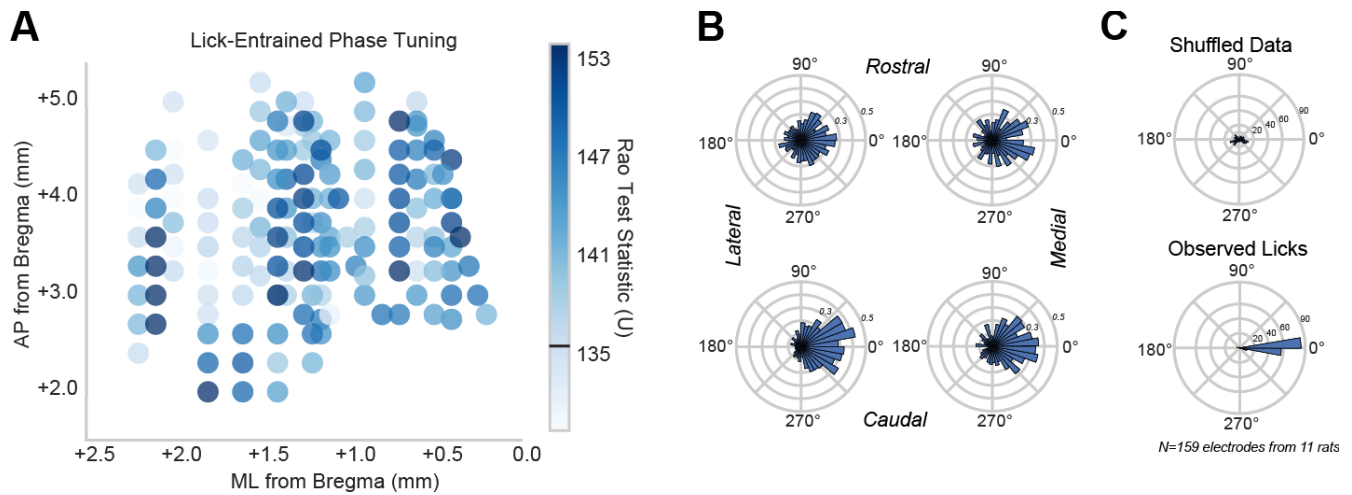

**Figure 4: Spatial distribution of entrainment to the lick cycle.** A. Spatial plot of phase tuning using the test statistic from Rao's spacing test of uniformity showed no obvious topography of lick-entrainment in the MFC. Individual electrode locations were plotted according to their location in reference to Bregma (N=159 electrodes). Recording sites were depicted as circles colored by the strength of their Rao test statistic [U]. The colorbar shows values of U from the 5th to 95th percentile range over all recording sites. Values above the black bar (near 135) were not uniform ( $p < 0.05$ ). B. Polar plots represent phase tuning examples from four spatial extremes of the graph in (A). The most rostral/lateral (top left;  $U=134.48$ ,  $p > 0.05$ ), rostral/medial (top right;  $U=152.30$ ,  $p < 0.001$ ), caudal/medial (bottom right;  $U=153.51$ ,  $p < 0.001$ ), and caudal/lateral (bottom left;  $U=147.44$ ,  $p < 0.001$ ) electrodes were chosen. There was no drastic difference among the four locations with regard to phase tuning. C. Group summaries of the mean phase angle at the time of licking from all 11 rats reveal significant phase tuning toward 0 degrees (i.e., peak or trough of the rhythm). These results were compared with phase angles measured from surrogate data (shuffled inter-lick intervals), which did not show evidence for significant phase entrainment.

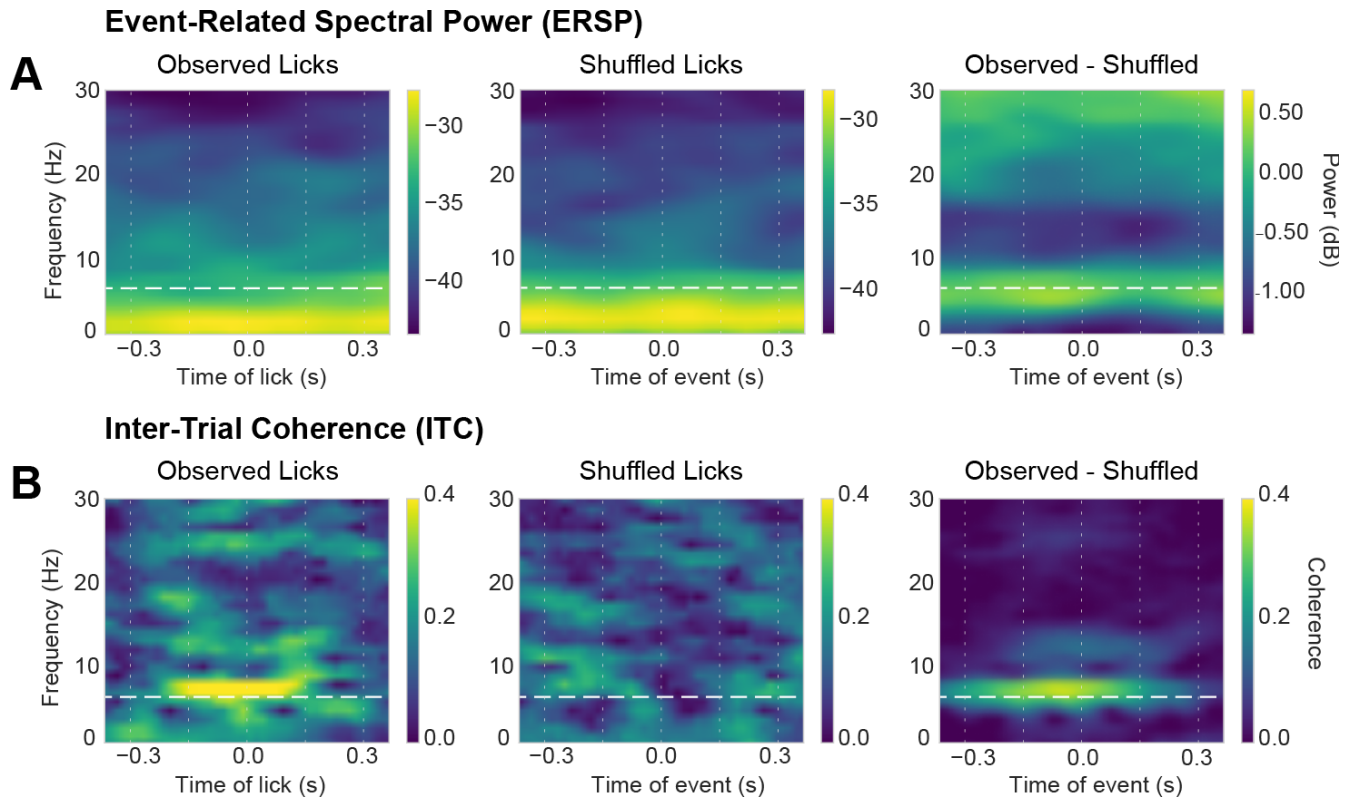

**Figure 5: Time-frequency analysis of lick-entrained LFP data.** Event-Related Spectral Power [ERSP] (top) and Inter-Trial Coherence [ITC] are shown for a typical LFP recording aligned to the time of licking in the behavioral task. The white horizontal dashed line depicts the median licking frequency. The white vertical dashed lines depict the median inter-lick intervals. ERSP and ITC measures were computed using observed licks (left) and surrogate data (middle), created by shuffling inter-lick intervals. A. Persistent elevated ERSP was notable at very low frequencies ( $\sim 2$  Hz, or delta) for both the observed (upper left) and shuffled (upper middle) events, i.e., was not entrained to the lick cycle. Subtraction of the shuffled ERSP matrix from the observed ERSP matrix revealed elevated power at the licking frequency (horizontal dash line). B. ITC was apparent near the licking frequency over a period of two lick cycles for the observed licks (lower left), but not the shuffled licks ((lower middle). Subtraction of the shuffled ITC matrix from the observed ITC matrix revealed elevated power at the licking frequency (horizontal dash line).

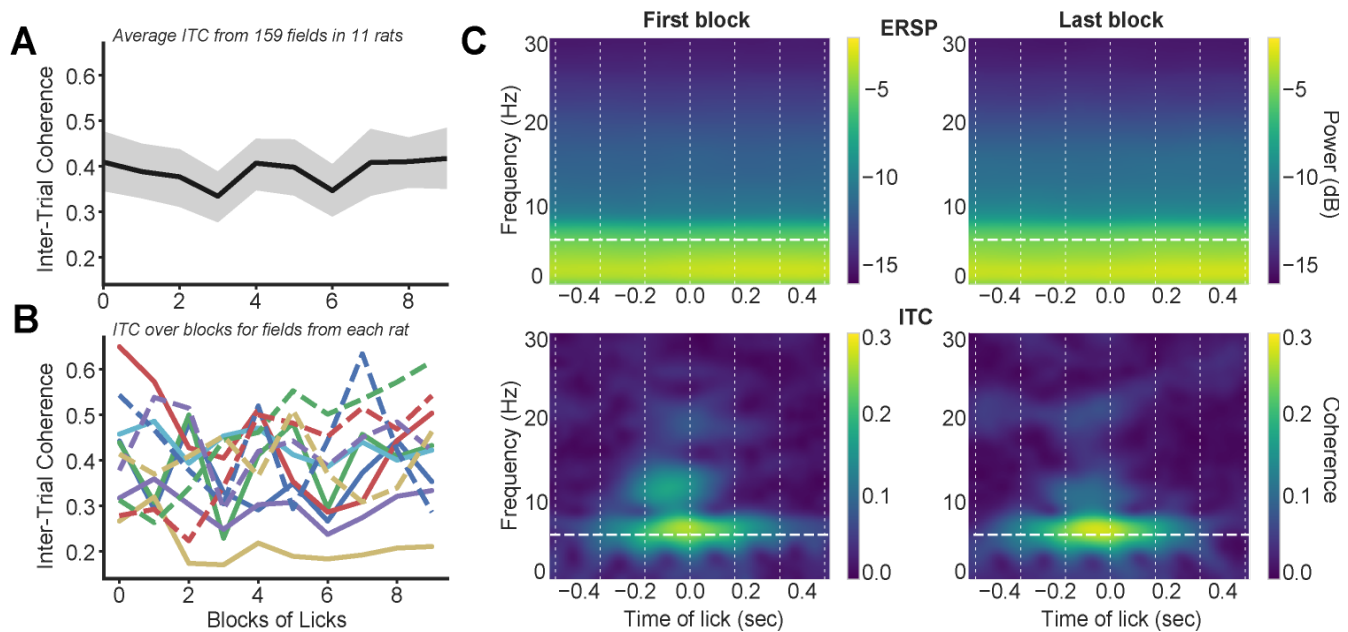

**Figure 6: Entrainment was stable over the 30-min test sessions.** Sessions were split into 10 blocks with equal numbers of licks and peak event-related spectral power [ERSP] and inter-trial coherence [ITC] were measured in the theta frequency range (6-12 Hz) over the inter-lick interval before and after each lick. A. Group average of peak ITC showed no evidence for a change in this measure over the data sets. Similar results were obtained for ERSP (not shown). B. Traces for peak ITC from each of the 11 rats. C. Grand average of ERSP and ITC for all LFPs in the first and last block. Together, these results suggest that entrainment of MFC LFPs to the lick cycle was not sensitive to cross-session factors such as satiety.

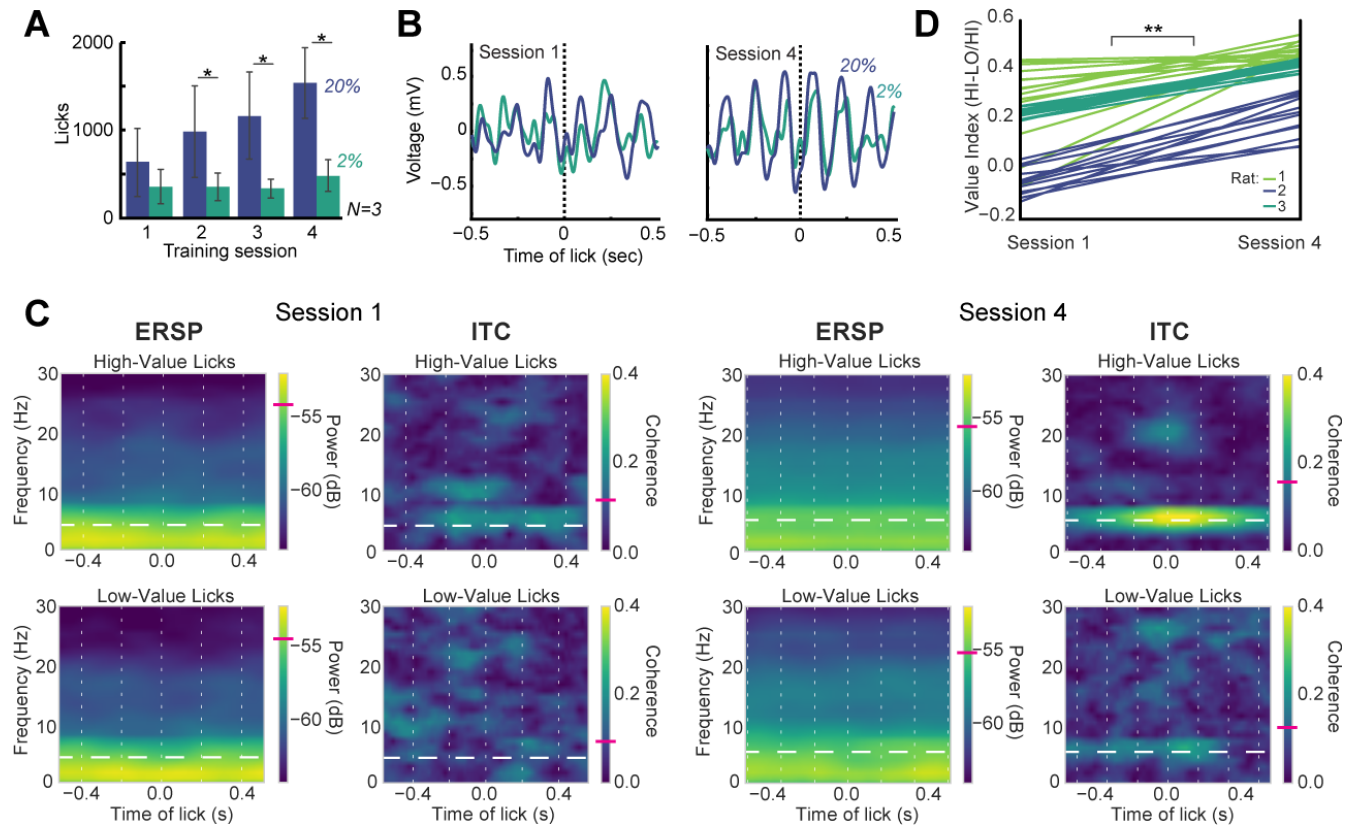

**Figure 7: MFC theta entrainment to licking develops with experience** A. Recordings were made in a subset of three rats as they learned the behavioral task. The rats showed increased licking for the high-value sucrose compared to the low-value sucrose after the first training session and the relative difference in licking increased over the first four training sessions. B. Neuronal entrainment to the lick cycle developed with experience in the task. For example, event-related potentials increased in size and apparent rhythmicity between the first and fourth training session (blue = higher-value 20% sucrose; green = lower value 2% sucrose). C. Increased entrainment to the lick cycle was also apparent in Inter-Trial Coherence [ITC], which was not apparent in session 1 and specific to licks that delivered high-value sucrose in session 4. (White vertical lines = average inter-lick intervals across the session. White horizontal dashed line = average licking frequency across the session. Magenta ticks in the colorbars denote average ERSP or ITC at the median licking frequency.) D. To capture differences in ITC values for the two types of licks across all recordings, we used a value index, defined as  $((ITC_{HI} - ITC_{LO})/ITC_{HI})$ . The index was based on the peak ITC values in a temporal window ranging from one inter-lick interval before lick onset up to 50 ms after the lick and for all frequencies between 4 and 12 Hz (“theta”). As shown in the parallel line plot, in which each line denotes a LFP recording from a distinct electrode, this index was larger in session 4 compared to session 1 (paired t-test:  $t(39)=-12.085$ ,  $p<10^{-6}$ ). \* $p<0.05$ ; \*\* $p<10^{-6}$ .

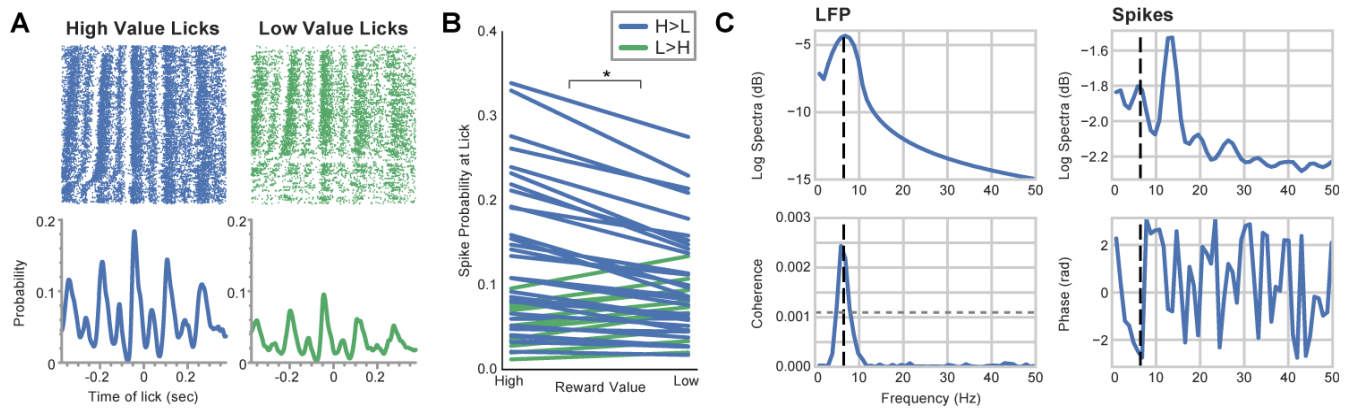

**Figure 8: Coherence between spikes and licks reflects reward information.** A. Multi-unit spike activity [MUA] was entrained to the lick cycle (high-value licks = blue; low-value licks = green). Rasters were sorted by the latency to the last lick before the lick at time 0, with the shortest preceding intervals at the top of the raster. The high-value licks were sub-sampled for this plot so that neural activity could be compared for the same number of total licks (at time 0). Peri-event histograms (bin: 1 ms, 10-point Gaussian smoothing), below the raster plots, denote the probability of spiking around the times of the licks. B. Group summary for spike probability at times of higher and lower value licks. Blue lines indicate higher spike probability for the higher value sucrose. Green lines indicate higher spike probability for the lower value sucrose. Spike probability was higher at the times of the higher value licks compared to times of the lower value licks (paired t-test:  $t(43)=3.78$ ,  $p<0.001$ ). 33 of the 44 MUA recordings showed higher spike probabilities for the higher value licks. C. Spike-field coherence found that all 44 MUA recordings were entrained to the LFP fluctuations that encoded reward information. Power spectra are shown in the upper row for example LFP and MUA recordings. Peak power was near the licking frequency (black dashed line) for the LFP. The main peak for the spike train was in the low beta range (12-15 Hz) and a second peak was at the licking frequency. Coherence between these signals (lower left plot) was found at the licking frequency (5.96 Hz), at a level approximately twice the 95% confidence interval. The phase between the spikes and fields at the licking frequency (lower right plot) was near  $-\pi$ , suggesting that the spikes and fields had an antiphase relationship. \* $p<0.001$ .

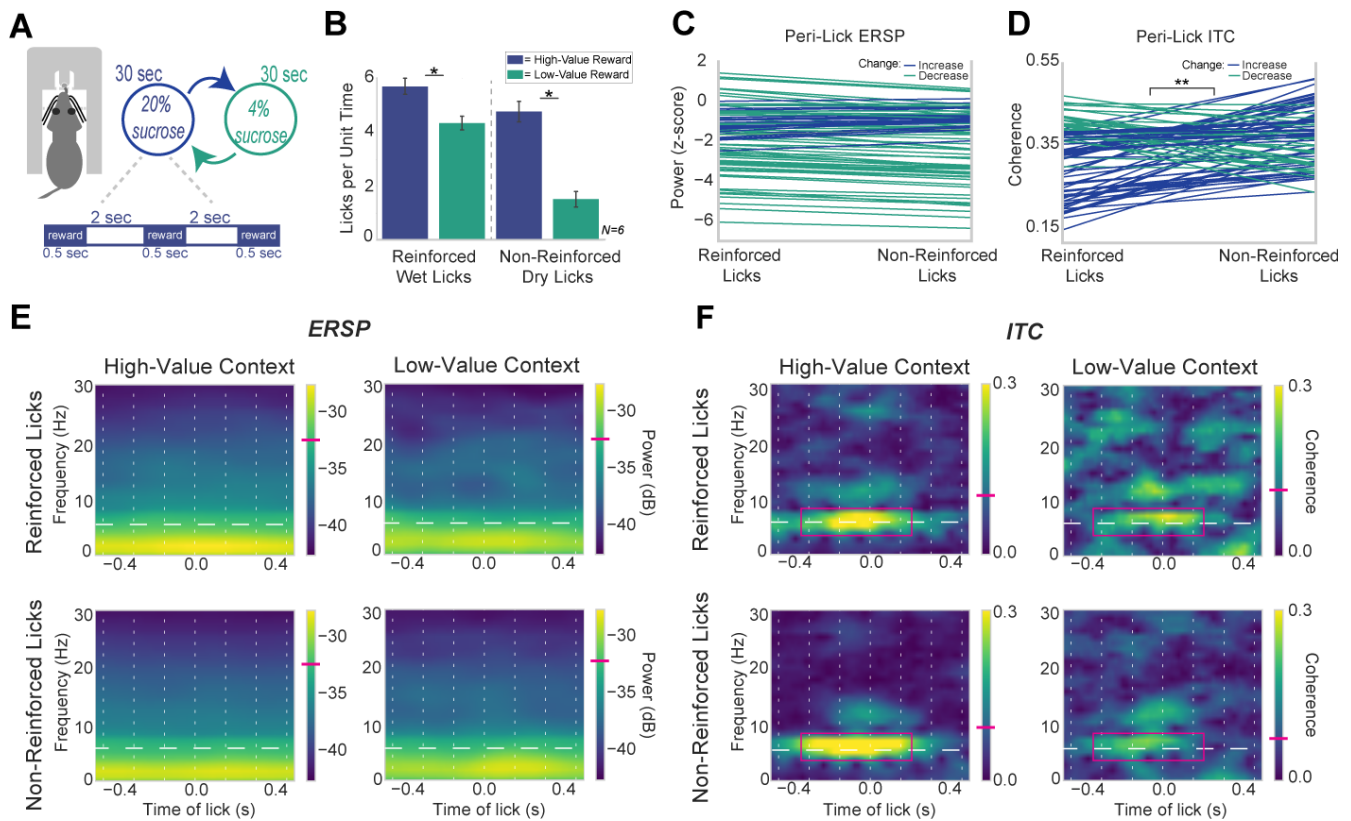

**Figure 9: Reward context, not reinforcement per se, drives reward signaling.** A. The Shifting Values Licking Task was modified to include a 2 sec period between reward deliveries. This period allowed for non-reinforced licks (dry licks at the spout) to be recorded within the 30 sec states of high or low-value sucrose availability. B. Group summary (N=6) of licks per unit time (total licks emitted in each context divided by time spend in each context). This measure revealed that rats licked less in the non-reinforced lower-value blocks compared to the other blocks. C. Peak ERS values for reinforced versus non-reinforced licks during the high-value blocks. Lines are colored by their direction (increase or decrease in power). There was no difference in power for reinforced versus non-reinforced licks ( $F_{(1,359)}=2.52$ ,  $p=0.11$ ). D. Peak ITC values for reinforced versus non-reinforced licks during the high-value blocks. The majority of LFPs showed increased phase-locking to non-reinforced licks (blue lines), while electrodes from two rats show a slight decrease in phase-locking for non-reinforced licks (green lines). Overall group summaries show an increase in phase-locking for the non-reinforced licks ( $F_{(1,359)} = 31.94$ ,  $p<10^{-6}$ ). E,F. Example of time-frequency analysis of a LFP from a rat that showed decreased ERS and ITC (magenta box) when the rat licked in the lower-value context. ITC was higher near the licking frequency when the higher value reward was available, regardless if the licks were reinforced or not. Horizontal white lines indicate the within-session licking frequencies. Vertical white lines indicate the inter-lick intervals for each session. Magenta ticks in the colorbars denote average ERS or ITC at the median licking frequency. \* $p<0.05$ ; \*\* $p<10^{-6}$ .

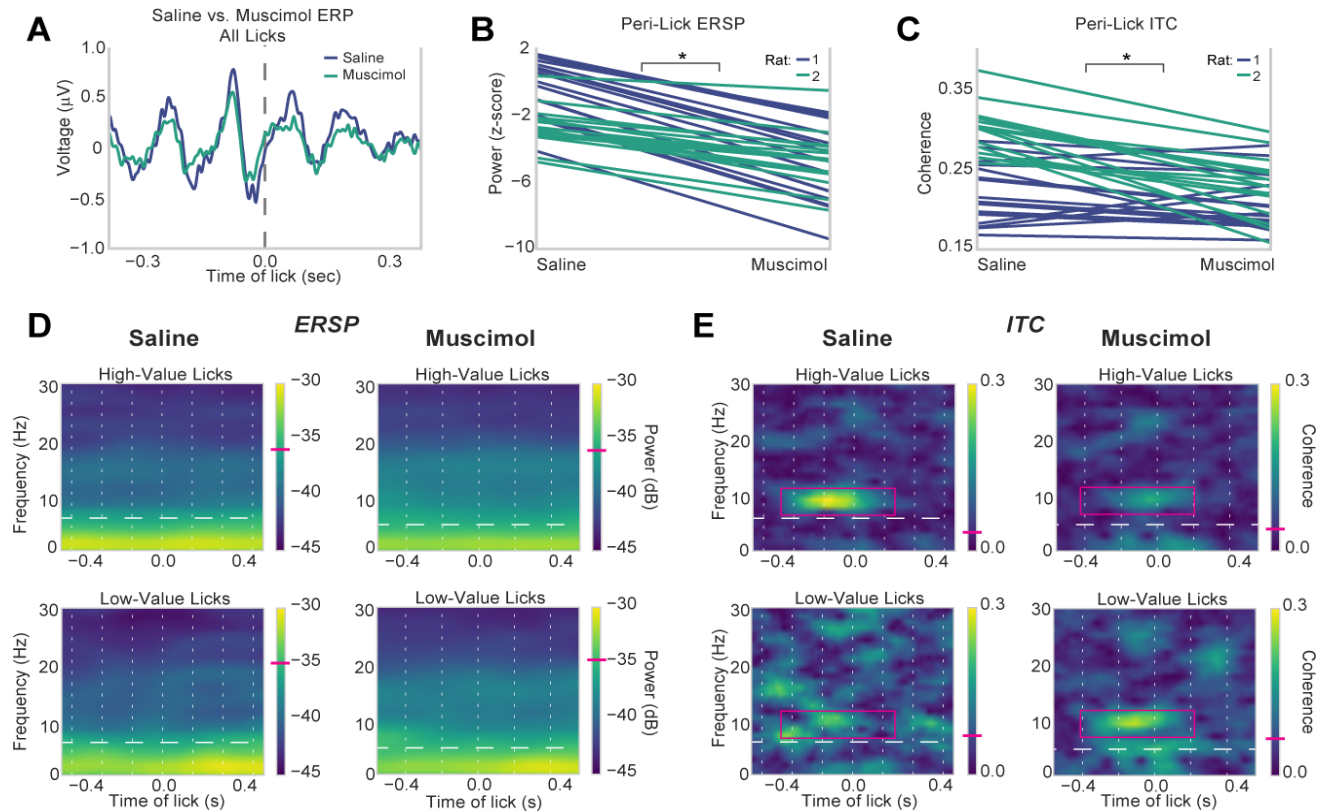

**Figure 10: Reward signaling depends on neuronal activity in the MFC.** Rats were tested with an electrode array in one hemisphere and an infusion cannula in the other, which was used to infuse either PBS or muscimol. A. Event-Related Potentials [ERP] from the saline (blue line) and muscimol (yellow line) sessions showed a similar overall time course around the licks. B. All electrodes showed a decrease in peak event-related spectral power [ERSP] at the licking frequency for higher value licks during the muscimol sessions compared to the PBS sessions ( $F_{(1,123)} = 96.09$ ,  $p < 10^{-5}$ ). C. Likewise, there was a reduction in peak inter-trial coherence [ITC] at the licking frequency for 28 of 32 electrodes ( $F_{(1,123)} = 18.17$ ,  $p = 3 \times 10^{-5}$ ). D,E. Example of time-frequency analysis. Effects were specific to licks for the high-value reward. Horizontal white lines indicate the within-session licking frequencies. Vertical white lines indicate the inter-lick intervals for each session. Magenta ticks in the colorbars denote average ERSP or ITC at the median licking frequency. \* $p < 10^{-5}$ .
